# Supplementary material for: Structures, magnetic refrigeration and single molecule-magnet behavior of five rhombus-shaped tetranuclear Ln(iii)-based clusters
Source: Royal Society of Chemistry journal article supplement (doi:10.1039/d0nj01969k), 2020-01-01
Supplement: d0nj01969k1.pdf [file d0nj01969k1.pdf]

## Electronic Supplementary Information

### Structures, magnetic refrigeration and single molecule-magnet behavior of five rhombus-shaped tetranuclear Ln(III)-based clusters

Wen-Min Wang,<sup>a,b</sup> Lei Huai,<sup>a</sup> Xi-Wen Wang,<sup>a</sup> Kai-Jun Jiang,<sup>b</sup> Hai-Yun Shen,<sup>b</sup> Hong-Ling Gao,<sup>b</sup> Ming Fang,<sup>\*c</sup> Jian-Zhong Cui<sup>\*b</sup>

#### Experimental Section

**Synthesis of 5-amino-8-hydroxylquinoline.** The synthesis of 5-amino-8-hydroxyquinoline was optimized compared to the method reported previously in the literature.<sup>1</sup> A mixture of 5-nitryl-8-hydroxylquinoline (50 mmol) and 5 % Pd/C (0.75 g), which was used as catalyst, in a 1.3 % ratio in absolute isopropanol was heated to 65 °C, and then 12 mL of 85 % hydrazine hydrate was dropped into the mixture over 1 h. It was heated to 90 °C and refluxed for 6 h. Finally, the solvent was removed, and dichloromethane was used to wash the grass green solid product (yield: 50.8%). Elemental analysis (%): Calcd for C<sub>9</sub>H<sub>8</sub>ON<sub>2</sub> (*F*<sub>w</sub> = 160.42): C 67.32, H 5.00, N 17.50. Found: C 67.28, H 4.97, N 17.82. IR (KBr, cm<sup>-1</sup>): 3345 (s), 1689 (s), 1625 (s), 1489 (s), 1346 (s), 914 (s), 746 (m).

**Synthesis of 5-(2-thenylidene)-8-hydroxylquinoline (HL).** The synthesis of 5-(2-thenylidene)-8-hydroxylquinoline (HL1) is similar to that of HL, the only difference being the use of 2-thenaldehyde (10 mmol) instead of 4-methyl benzaldehyde (10 mmol), the detailed outline of the synthesis of the ligand (HL1) is shown as Scheme. S1. Elemental analysis (%) Calcd for C<sub>14</sub>H<sub>9</sub>N<sub>2</sub>OS (*F*<sub>w</sub> = 253): C, 77.86; H, 5.34; N,

---

<sup>a</sup> Department of Chemistry, Taiyuan Normal University, Jinzhong 030619, China

<sup>b</sup> Department of Chemistry, Tianjin University, Tianjin, 300072, China

<sup>c</sup> Department of Chemistry, Hebei Normal University of Science & Technology, Qinhuangdao 066004, China

\*Corresponding Authors E-mail : [cuijianzhong@tju.edu.cn](mailto:cuijianzhong@tju.edu.cn), [fangmingchem@163.com](mailto:fangmingchem@163.com).

10.69. Found: C, 77.65; H, 5.62; N, 10.40. IR (cm<sup>-1</sup>): 3518 (s), 1612 (w), 1502 (s), 1468 (w), 1413 (s), 1280 (m), 1243 (m), 1193 (m), 1048 (w), 788 (m), 700 (m), 566 (w), 498 (w).

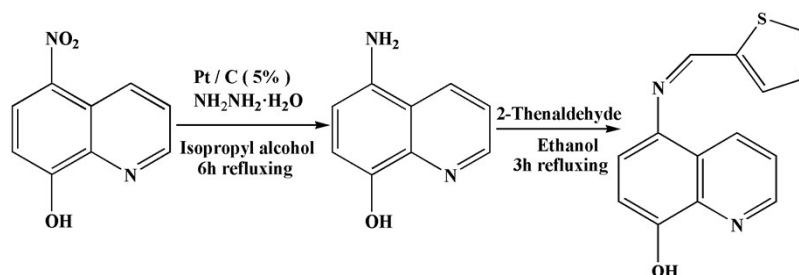

**Scheme. S1** Detailed outline of the synthesis of the ligand (HL).

**Tables S1** Selected bond lengths (Å) and angles (°) for cluster **1**<sup>a</sup>.

| <b>Bond lengths</b> |          |                 |           |
|---------------------|----------|-----------------|-----------|
| Eu(1)-O(5)          | 2.339(6) | Eu(1)-O(4)      | 2.355(6)  |
| Eu(1)-O(8)          | 2.376(5) | Eu(1)-O(1)      | 2.399(6)  |
| Eu(1)-O(8)#1        | 2.401(5) | Eu(1)-O(2)#1    | 2.422(6)  |
| Eu(1)-O(3)#1        | 2.449(6) | Eu(2)-O(6)      | 2.335(6)  |
| Eu(2)-O(8)          | 2.350(5) | Eu(2)-O(7)      | 2.355(6)  |
| Eu(2)-O(2)          | 2.413(6) | Eu(2)-O(3)      | 2.418(6)  |
| Eu(2)-N(3)          | 2.549(7) | Eu(2)-O(1)      | 2.441(5)  |
| Eu(2)-N(5)          | 2.573(7) | Eu(1)-N(1)      | 2.586(7)  |
| <b>Bond angle</b>   |          |                 |           |
| O(5)-Eu(1)-O(4)     | 72.6(2)  | O(5)-Eu(1)-O(8) | 139.3(2)  |
| O(4)-Eu(1)-O(8)     | 77.8(2)  | O(4)-Eu(1)-O(1) | 86.7(2)   |
| O(5)-Eu(1)-O(1)     | 81.0(2)  | O(8)-Eu(1)-O(1) | 69.79(18) |

<sup>a</sup>Symmetry transformations used to generate equivalent atoms: #1 -x+1, -y+2, -z

**Tables S2** Selected bond lengths (Å) and angles (°) for cluster **2**<sup>a</sup>.

| <b>Bond lengths</b> |          |              |          |
|---------------------|----------|--------------|----------|
| Gd(1)-O(5)          | 2.335(4) | Gd(2)-O(6)   | 2.327(5) |
| Gd(1)-O(4)          | 2.335(5) | Gd(2)-O(7)   | 2.343(5) |
| Gd(1)-O(8)#1        | 2.339(4) | Gd(2)-O(8)#1 | 2.363(4) |
| Gd(1)-O(3)#1        | 2.408(4) | Gd(2)-O(2)   | 2.382(4) |
| Gd(1)-O(1)          | 2.418(5) | Gd(2)-O(8)   | 2.392(4) |
| Gd(1)-O(2)          | 2.419(4) | Gd(2)-O(3)   | 2.420(5) |

|                    |            |                      |            |
|--------------------|------------|----------------------|------------|
| Gd(1)-N(5)#1       | 2.528(6)   | Gd(2)-O(1)#1         | 2.441(4)   |
| Gd(1)-N(1)         | 2.558(5)   | Gd(2)-N(3)           | 2.571(5)   |
| <b>Bond angles</b> |            |                      |            |
| Gd(1)-O(1)-Gd(2)#1 | 95.16(15)  | Gd(1)#1-O(8)-Gd(2)#1 | 111.78(18) |
| Gd(2)-O(2)-Gd(1)   | 108.36(17) | Gd(1)#1-O(8)-Gd(2)   | 98.59(14)  |
| Gd(1)#1-O(3)-Gd(2) | 95.98(15)  | Gd(2)#1-O(8)-Gd(2)   | 108.15(16) |

<sup>a</sup> Symmetry transformations used to generate equivalent atoms: #1 -x+2, -y+2, -z

**Tables S3** Selected bond lengths (Å) and angles (°) for cluster **3<sup>a</sup>**.

| <b>Bond lengths</b> |            |                    |            |
|---------------------|------------|--------------------|------------|
| Tb(1)-O(5)          | 2.317(3)   | Tb(1)-O(4)         | 2.335(3)   |
| Tb(1)-O(8)          | 2.351(3)   | Tb(1)-O(1)         | 2.375(3)   |
| Tb(1)-O(8)#1        | 2.367(3)   | Tb(1)-O(2)#1       | 2.401(3)   |
| Tb(1)-N(1)          | 2.563(4)   | Tb(1)-O(3)#1       | 2.426(3)   |
| Tb(2)-O(6)          | 2.314(3)   | Tb(2)-O(7)         | 2.330(3)   |
| Tb(2)-O(8)          | 2.329(3)   | Tb(2)-O(3)         | 2.394(3)   |
| Tb(2)-O(2)          | 2.385(3)   | Tb(2)-O(1)         | 2.412(3)   |
| Tb(2)-N(3)          | 2.528(4)   | Tb(2)-N(5)         | 2.549(4)   |
| <b>Bond angles</b>  |            |                    |            |
| Tb(1)-O(1)-Tb(2)    | 108.20(11) | Tb(2)-O(2)-Tb(1)#1 | 96.21(10)  |
| Tb(2)-O(3)-Tb(1)#1  | 95.31(11)  | Tb(2)-O(8)-Tb(1)   | 111.90(11) |
| Tb(2)-O(8)-Tb(1)#1  | 98.50(10)  | Tb(1)-O(8)-Tb(1)#1 | 108.58(11) |

<sup>a</sup> Symmetry transformations used to generate equivalent atoms: #1 -x+1, -y+1, -z

**Tables S4** Selected bond lengths (Å) and angles (°) for cluster **4<sup>a</sup>**.

| <b>Bond lengths</b> |          |            |          |
|---------------------|----------|------------|----------|
| Dy(1)-O(4)          | 2.301(2) | Dy(1)-O(5) | 2.315(2) |
| Dy(1)-O(8)          | 2.330(2) | Dy(1)-O(2) | 2.367(2) |
| Dy(1)-O(1)          | 2.383(2) | Dy(1)-O(3) | 2.401(2) |
| Dy(1)-N(3)          | 2.513(3) | Dy(1)-N(1) | 2.546(3) |
| Dy(2)-O(1)#1        | 2.416(2) | Dy(2)-N(5) | 2.548(3) |
| Dy(2)-O(7)          | 2.300(2) | Dy(2)-O(6) | 2.324(2) |

|            |          |              |          |
|------------|----------|--------------|----------|
| Dy(2)-O(8) | 2.341(2) | Dy(2)-O(8)#1 | 2.346(2) |
| Dy(2)-O(3) | 2.365(2) | Dy(2)-O(2)#1 | 2.393(2) |

**Bond angles**

|                    |           |                    |           |
|--------------------|-----------|--------------------|-----------|
| Dy(1)-O(1)-Dy(2)#1 | 95.01(8)  | Dy(1)-O(2)-Dy(2)#1 | 96.03(8)  |
| Dy(2)-O(3)-Dy(1)   | 108.23(9) | Dy(1)-O(8)-Dy(2)   | 111.49(9) |
| Dy(1)-O(8)-Dy(2)#1 | 98.34(8)  | Dy(2)-O(8)-Dy(2)#1 | 108.81(9) |

<sup>a</sup> Symmetry transformations used to generate equivalent atoms: #1 -x+1, -y, -z

**Tables S5** Selected bond lengths (Å) and angles (°) for cluster **5<sup>a</sup>**.

**Bond lengths**

|            |          |              |          |
|------------|----------|--------------|----------|
| Er(1)-O(4) | 2.282(3) | Er(2)-O(7)   | 2.303(3) |
| Er(1)-O(8) | 2.288(3) | Er(2)-O(8)   | 2.308(3) |
| Er(1)-O(5) | 2.297(3) | Er(2)-O(8)#1 | 2.330(3) |
| Er(1)-O(1) | 2.351(3) | Er(2)-O(3)   | 2.332(3) |
| Er(1)-O(2) | 2.352(3) | Er(2)-O(2)#1 | 2.360(3) |
| Er(1)-O(3) | 2.371(3) | Er(2)-O(1)#1 | 2.392(3) |
| Er(1)-N(3) | 2.492(4) | Er(2)-N(5)   | 2.518(3) |
| Er(2)-O(6) | 2.285(3) | Er(1)-N(1)   | 2.517(4) |

**Bond angles**

|                    |            |                    |            |
|--------------------|------------|--------------------|------------|
| Er(1)-O(1)-Er(2)#1 | 95.02(10)  | Er(1)-O(8)-Er(2)   | 112.14(10) |
| Er(1)-O(2)-Er(2)#1 | 95.84(9)   | Er(1)-O(8)-Er(2)#1 | 98.47(10)  |
| Er(2)-O(3)-Er(1)   | 108.31(11) | Er(2)-O(8)-Er(2)#1 | 108.63(10) |

<sup>a</sup> Symmetry transformations used to generate equivalent atoms: #1 -x+2, -y-1, -z+1

**Table S6** The Dy<sup>III</sup> geometry analysis by SHAPE 2.0 for cluster **4**.

| Cluster 4                     | <i>D</i> <sub>4d</sub> SAPR | <i>D</i> <sub>2d</sub> TDD | <i>C</i> <sub>2v</sub> JBTPR | <i>C</i> <sub>2v</sub> BTPR | <i>D</i> <sub>2d</sub> JSD |
|-------------------------------|-----------------------------|----------------------------|------------------------------|-----------------------------|----------------------------|
| Dy <sub>1</sub> <sup>3+</sup> | 1.075                       | 2.213                      | 2.886                        | 2.119                       | 5.064                      |
| Dy <sub>2</sub> <sup>3+</sup> | 0.818                       | 2.515                      | 2.043                        | 1.478                       | 4.650                      |

**SAPR-8** = Square antiprism; **TDD-8** = Triangular dodecahedron; **JBTPR-8** = Biaugmented trigonal prism J50; **BTPR-8** = Biaugmented trigonal prism; **JSD-8** = Snub diphenoid J84.

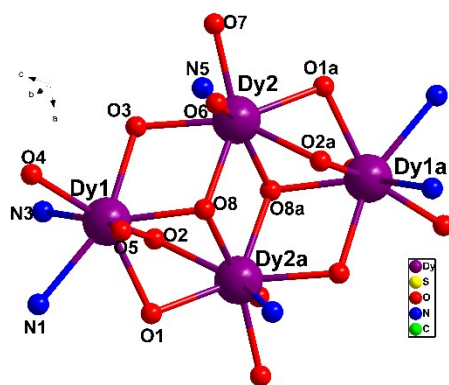

Fig. S1 The coordinate atom labels of central Dy(III) ions in cluster 4.

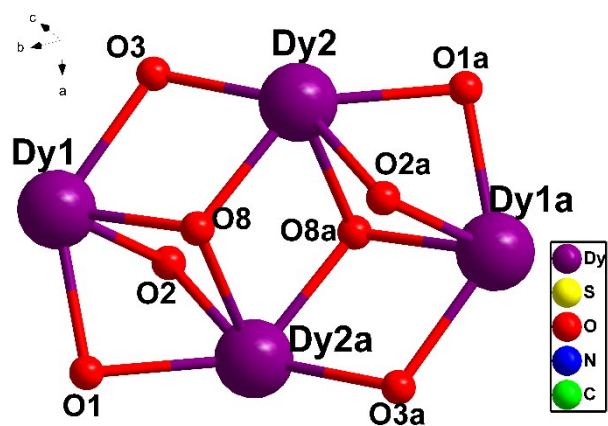

Fig. S2 The four central Dy atoms are bridged by six  $\mu_2$ -O and two  $\mu_3$ -O atoms forming the Dy<sub>4</sub> core.

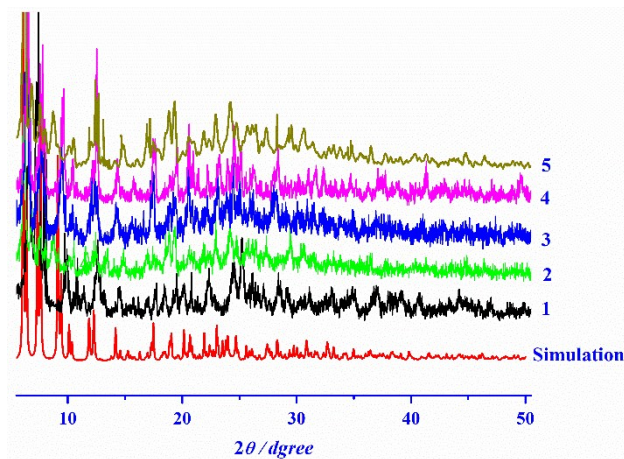

Fig. S3 The PXRD patterns for 1-5 and the corresponding simulated one.

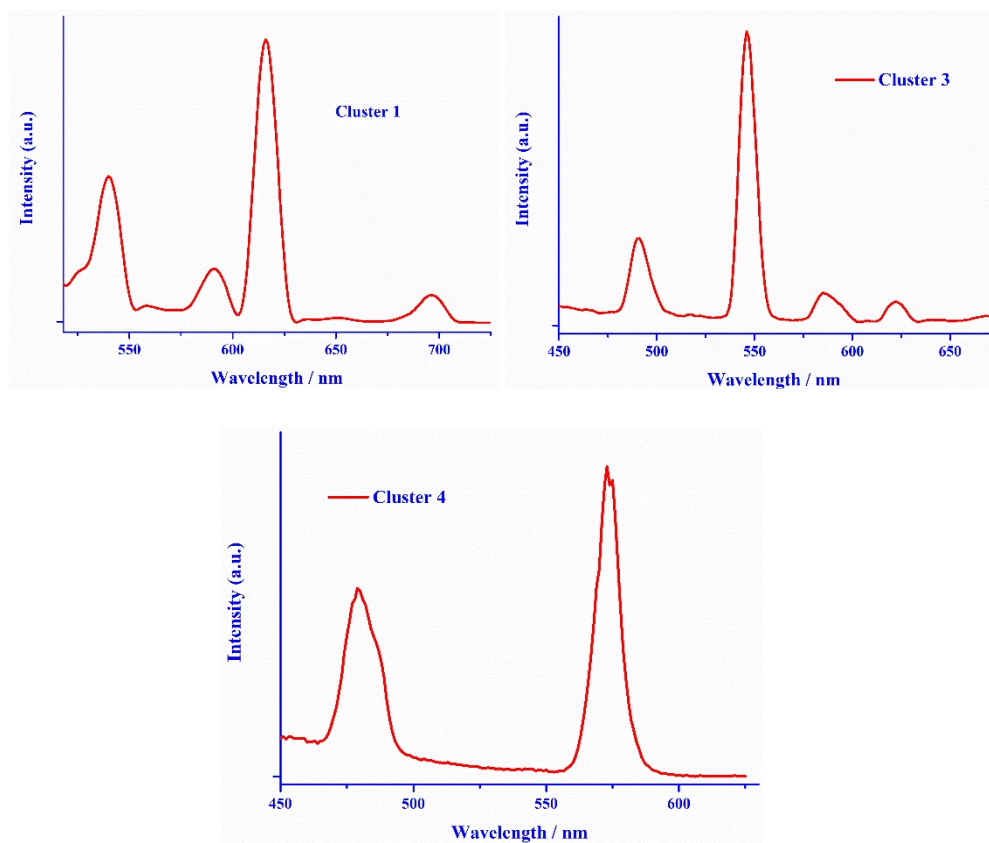

Fig. S4 The solid-state luminescence spectrums of clusters **1**, **3**, and **4** at room temperature.
